# Supplementary material for: Predicting climate-change induced heat-related illness risk in Grand Canyon National Park visitors
Source: PLoS One. 2023 Aug 9;18(8):e0288812. doi: 10.1371/journal.pone.0288812 (PMC10411749; doi:10.1371/journal.pone.0288812)
Supplement: S3 File — Table of predicted mean increase in cases per year for each climate model, estimated using lm(Events ~ year). Events increased per year taken as coefficient of slope [95% CI]. (CSV) [file pone.0288812.s004.csv]

Global climate model	RCP 4.5	RCP 8.5
CanESM2	0.0016 [-0.00042, 0.00369]	0.0049 [0.00261, 0.00726]
CNRM-CM5	0.0045 [0.00226, 0.00672]	0.0099 [0.00764, 0.01214]
CSIRO-Mk3-6-0	0.003 [0.00043, 0.00559]	0.0069 [0.0042, 0.00962]
GFDL-ESM2G	0.0011 [-0.00199, 0.00418]	0.0086 [0.00515, 0.0121]
GFDL-ESM2M	0.0025 [-0.00075, 0.00572]	0.009 [0.00532, 0.01262]
HadGEM2-CC365	0.0045 [0.00226, 0.00677]	0.0123 [0.00888, 0.01565]
HadGEM2-ES365	0.0035 [0.00122, 0.00571]	0.0118 [0.00935, 0.01431]
inmcm4	0.0022 [-0.00086, 0.00521]	0.0102 [0.00707, 0.01337]
IPSL-CM5A-LR	0.0062 [0.00331, 0.00918]	0.0139 [0.01025, 0.01747]
IPSL-CM5A-MR	0.0052 [0.00258, 0.00783]	0.0122 [0.00923, 0.01524]
MIROC-ESM-CHEM	0.0095 [0.00629, 0.01278]	0.0368 [0.03135, 0.04221]
MIROC-ESM	0.0101 [0.00704, 0.01313]	0.0338 [0.02907, 0.03853]
MIROC5	0.0058 [0.00296, 0.00864]	0.0093 [0.00663, 0.01196]
MRI-CGCM3	0.002 [-0.00049, 0.00458]	0.009 [0.00604, 0.01187]
